# Supplementary material for: Acidic medium synthesis of zeolites – an avenue to control the structure-directing power of organic templates
Source: Royal Society of Chemistry journal article supplement (doi:10.1039/d2dt01554d), 2022-01-01
Supplement: d2dt01554d1.pdf [file d2dt01554d1.pdf]

Supplementary Information for

## Acidic medium synthesis of zeolites – an avenue to control the structure-directing power of the organic template

Guangying Fu,<sup>a</sup> Eddy Dib,<sup>b</sup> Qiaolin Lang,<sup>a</sup> Haonuan Zhao,<sup>a,b</sup> Songxia Wang,<sup>a</sup> Ruiqin Ding,<sup>a</sup> Xiaobo Yang,<sup>\*a</sup> and Valentin Valtchev<sup>\*a,b</sup>

<sup>a</sup> The ZeoMat Group, Qingdao Institute of Bioenergy and Bioprocess Technology, CAS, Laoshan District, CN-266101 Qingdao, China.

<sup>b</sup> Normandie University, ENSICAEN, UNICAEN, CNRS, Laboratoire Catalyse et Spectrochimie, F-14000 Caen, France.

### Table of Contents

#### S1. Additional synthesis and characterization results

**Figure S1.1.** The XRD patterns of the crystallizing **MTN** material obtained from a hydrogel with high F<sup>-</sup> content (1SiO<sub>2</sub>: 0.5HMTA: 0.12NH<sub>4</sub>F: 0.18HF: 50H<sub>2</sub>O, pH = 5.9) after 31 days of 160°C hydrothermal treatment, Sample A1.

**Figure S1.2.** XRD of the recovered solid products in the experiment series of temperature tests: Sample C10, 1SiO<sub>2</sub>:0.5HMTA:0.056NH<sub>4</sub>F:0.083HF:50H<sub>2</sub>O, pH = 6.5, crystallizes into cristobalite at 180°C in 36 days; Sample C11, 1SiO<sub>2</sub>:0.5HMTA:0.125HF:50H<sub>2</sub>O, pH = 5.6, remains amorphous at 140°C in 39 days.

**Figure S1.3.** XRD pattern of |TMA<sup>+</sup>,F<sup>-</sup>|-dodecasil 3C-**MTN** crystallized at basic conditions as a reference material. Sample was R1 obtained at 180°C in 14 days.

**Figure S1.4.** SEM pictures of |TMA<sup>+</sup>,F<sup>-</sup>|-dodecasil 3C-**MTN** crystallized at basic conditions as a reference material. Sample R1 was obtained at 180°C in 14 days.

#### S2. Model validation by Rietveld refinement

**Figure S2.1** Population of HMTA<sup>+</sup> ions at the centers of hexakaidecahedral [5<sup>12</sup>6<sup>4</sup>] cages as the results of energy minimization of 5 million Monte Carlo configurations.

**Table S2.1.** Refined atomic coordinates in the unit cell (cubic, a = 19.39662 Å).

## S1. Additional synthesis and characterization results

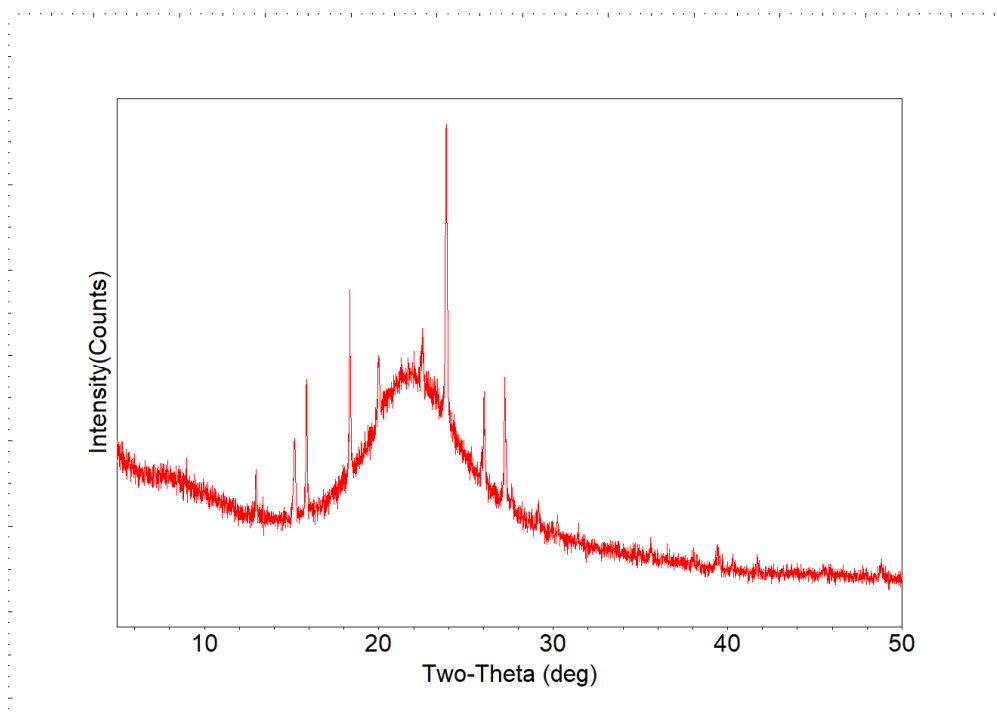

**Figure S1.1.** The XRD patterns of the crystallizing MTN material obtained from a hydrogel with high F<sup>-</sup> content (1SiO<sub>2</sub>: 0.5HMTA: 0.12NH<sub>4</sub>F: 0.18HF: 50H<sub>2</sub>O, pH = 5.9) after 31 days of 160°C hydrothermal treatment.

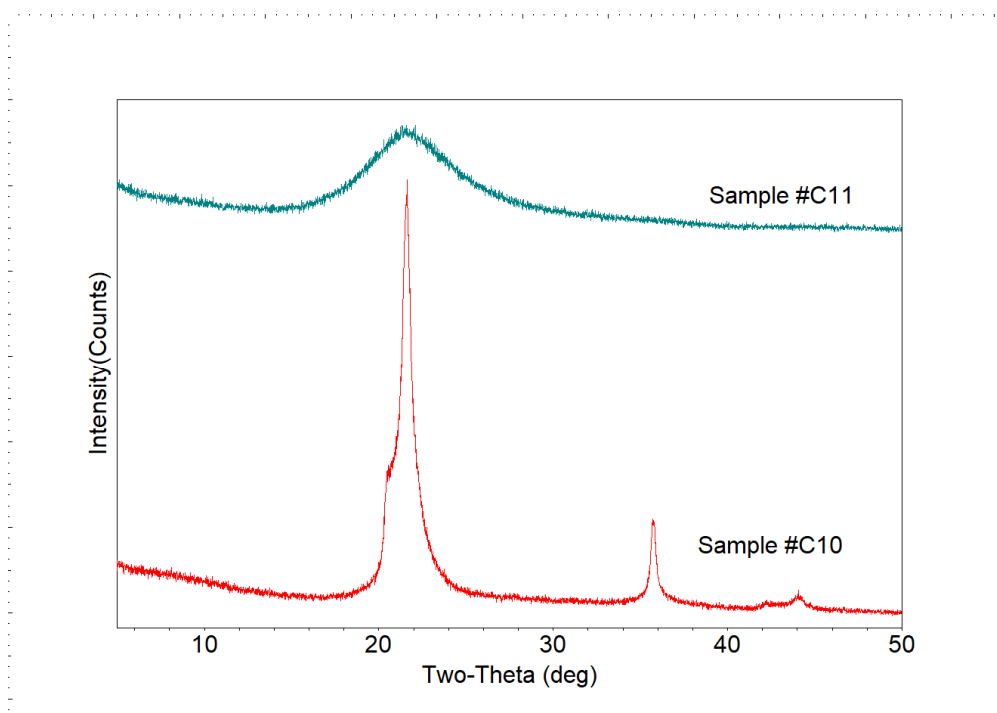

**Figure S1.2.** XRD of the recovered solid products in the experiment series of temperature tests: Sample C10, 1SiO<sub>2</sub>:0.5HMTA:0.056NH<sub>4</sub>F:0.083HF:50H<sub>2</sub>O, pH = 6.5, crystallizes into cristobalite at 180°C in 36 days; Sample C11, 1SiO<sub>2</sub>:0.5HMTA:0.125HF:50H<sub>2</sub>O, pH = 5.6, remains amorphous at 140°C in 39 days.

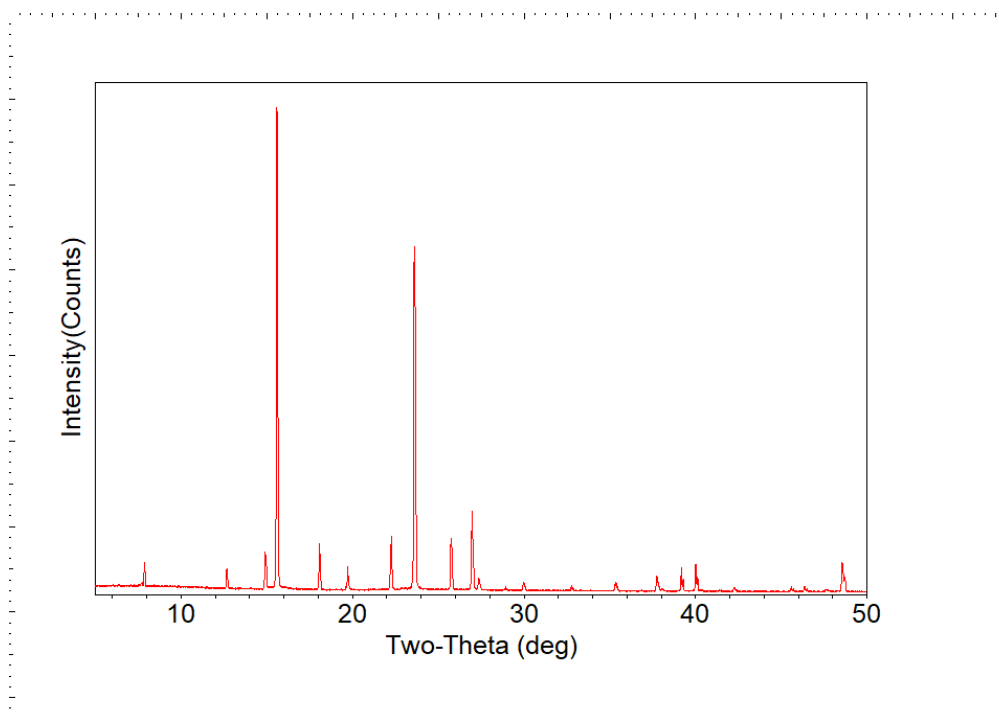

**Figure S1.3.** XRD patterns of  $|\text{TMA}^+, \text{F}^-|$ -dodecasil 3C-MTN crystallized at basic conditions as a reference material. Sample R1 was obtained at 180°C for 14 days.

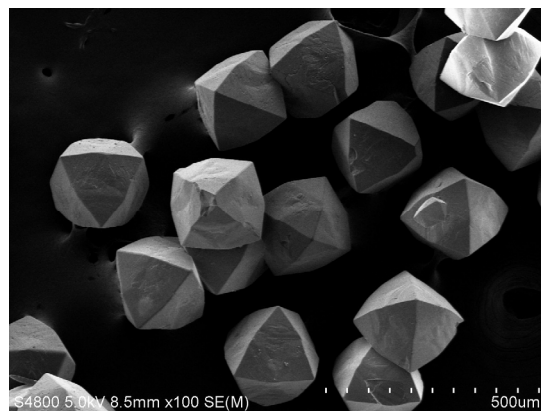

**Figure S1.4.** SEM pictures of  $|\text{TMA}^+, \text{F}^-|$ -dodecasil 3C-MTN crystallized at basic conditions as a reference material. Sample R1 was obtained at 180°C in 14 days.

## S2. Model validation by Rietveld refinement

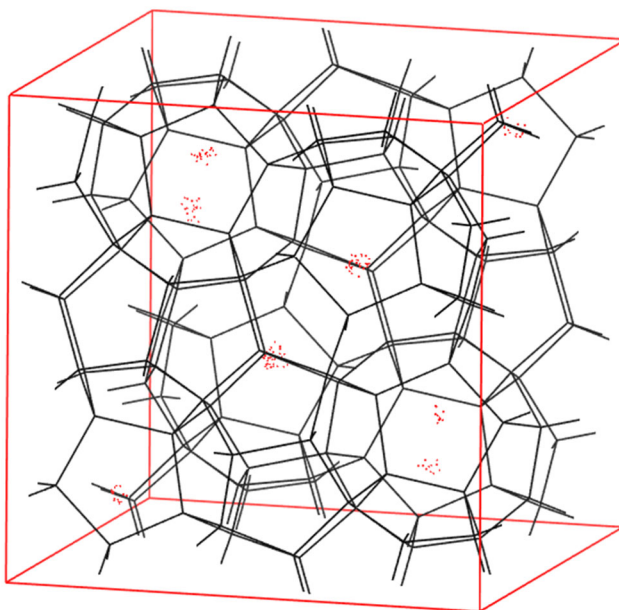

**Figure S2.1** Population of HMTA<sup>+</sup> ions at the centers of hexakaidecahedral [5<sup>12</sup>6<sup>4</sup>] cages as the results of energy minimization of 5 million Monte Carlo configurations (The corresponding 3D model in the file HMTA+population.msi).

**Table S2.1.** Refined atomic coordinates in the unit cell (cubic, a = 19.39662).

| Site Label | Atom Type | x      | y      | z      | Multiplicity |
|------------|-----------|--------|--------|--------|--------------|
| O1         | O         | 0.0485 | 0.0485 | 0.2952 | 1            |
| Si2        | Si        | 0.068  | 0.068  | 0.3712 | 1            |
| O3         | O         | 0.0485 | 0.5485 | 0.7952 | 1            |
| Si4        | Si        | 0.068  | 0.568  | 0.8712 | 1            |
| O5         | O         | 0.5485 | 0.0485 | 0.7952 | 1            |
| Si6        | Si        | 0.568  | 0.068  | 0.8712 | 1            |
| O7         | O         | 0.5485 | 0.5485 | 0.2952 | 1            |
| Si8        | Si        | 0.568  | 0.568  | 0.3712 | 1            |
| O9         | O         | 0.7015 | 0.2015 | 0.7952 | 1            |
| Si10       | Si        | 0.682  | 0.182  | 0.8712 | 1            |
| O11        | O         | 0.7015 | 0.7015 | 0.2952 | 1            |
| Si12       | Si        | 0.682  | 0.682  | 0.3712 | 1            |
| O13        | O         | 0.2015 | 0.5485 | 0.4548 | 1            |
| Si14       | Si        | 0.182  | 0.568  | 0.3788 | 1            |
| O15        | O         | 0.2015 | 0.0485 | 0.9548 | 1            |
| Si16       | Si        | 0.182  | 0.068  | 0.8788 | 1            |
| O17        | O         | 0.7015 | 0.0485 | 0.4548 | 1            |
| Si18       | Si        | 0.682  | 0.068  | 0.3788 | 1            |
| O19        | O         | 0.5485 | 0.7015 | 0.9548 | 1            |

|      |    |        |        |        |   |
|------|----|--------|--------|--------|---|
| Si20 | Si | 0.568  | 0.682  | 0.8788 | 1 |
| O21  | O  | 0.0485 | 0.7015 | 0.4548 | 1 |
| Si22 | Si | 0.068  | 0.682  | 0.3788 | 1 |
| O23  | O  | 0.2952 | 0.0485 | 0.0485 | 1 |
| Si24 | Si | 0.3712 | 0.068  | 0.068  | 1 |
| O25  | O  | 0.2952 | 0.5485 | 0.5485 | 1 |
| Si26 | Si | 0.3712 | 0.568  | 0.568  | 1 |
| O27  | O  | 0.7952 | 0.0485 | 0.5485 | 1 |
| Si28 | Si | 0.8712 | 0.068  | 0.568  | 1 |
| O29  | O  | 0.7952 | 0.5485 | 0.0485 | 1 |
| Si30 | Si | 0.8712 | 0.568  | 0.068  | 1 |
| O31  | O  | 0.7952 | 0.7015 | 0.2015 | 1 |
| Si32 | Si | 0.8712 | 0.682  | 0.182  | 1 |
| O33  | O  | 0.2952 | 0.7015 | 0.7015 | 1 |
| Si34 | Si | 0.3712 | 0.682  | 0.682  | 1 |
| O35  | O  | 0.4548 | 0.2015 | 0.5485 | 1 |
| Si36 | Si | 0.3788 | 0.182  | 0.568  | 1 |
| O37  | O  | 0.4548 | 0.7015 | 0.0485 | 1 |
| Si38 | Si | 0.3788 | 0.682  | 0.068  | 1 |
| O39  | O  | 0.9548 | 0.5485 | 0.7015 | 1 |
| Si40 | Si | 0.8788 | 0.568  | 0.682  | 1 |
| O41  | O  | 0.9548 | 0.0485 | 0.2015 | 1 |
| Si42 | Si | 0.8788 | 0.068  | 0.182  | 1 |
| O43  | O  | 0.4548 | 0.0485 | 0.7015 | 1 |
| Si44 | Si | 0.3788 | 0.068  | 0.682  | 1 |
| O45  | O  | 0.0485 | 0.2952 | 0.0485 | 1 |
| Si46 | Si | 0.068  | 0.3712 | 0.068  | 1 |
| O47  | O  | 0.0485 | 0.7952 | 0.5485 | 1 |
| Si48 | Si | 0.068  | 0.8712 | 0.568  | 1 |
| O49  | O  | 0.5485 | 0.2952 | 0.5485 | 1 |
| Si50 | Si | 0.568  | 0.3712 | 0.568  | 1 |
| O51  | O  | 0.5485 | 0.7952 | 0.0485 | 1 |
| Si52 | Si | 0.568  | 0.8712 | 0.068  | 1 |
| O53  | O  | 0.2015 | 0.7952 | 0.7015 | 1 |
| Si54 | Si | 0.182  | 0.8712 | 0.682  | 1 |
| O55  | O  | 0.2015 | 0.2952 | 0.2015 | 1 |
| Si56 | Si | 0.182  | 0.3712 | 0.182  | 1 |
| O57  | O  | 0.7015 | 0.2952 | 0.7015 | 1 |
| Si58 | Si | 0.682  | 0.3712 | 0.682  | 1 |
| O59  | O  | 0.5485 | 0.4548 | 0.2015 | 1 |
| Si60 | Si | 0.568  | 0.3788 | 0.182  | 1 |
| O61  | O  | 0.0485 | 0.4548 | 0.7015 | 1 |
| Si62 | Si | 0.068  | 0.3788 | 0.682  | 1 |
| O63  | O  | 0.7015 | 0.9548 | 0.5485 | 1 |
| Si64 | Si | 0.682  | 0.8788 | 0.568  | 1 |
| O65  | O  | 0.7015 | 0.4548 | 0.0485 | 1 |

|       |    |        |        |        |   |
|-------|----|--------|--------|--------|---|
| Si66  | Si | 0.682  | 0.3788 | 0.068  | 1 |
| O67   | O  | 0.7985 | 0.2985 | 0.2048 | 1 |
| Si68  | Si | 0.818  | 0.318  | 0.1288 | 1 |
| O69   | O  | 0.7985 | 0.7985 | 0.7048 | 1 |
| Si70  | Si | 0.818  | 0.818  | 0.6288 | 1 |
| O71   | O  | 0.9515 | 0.9515 | 0.7048 | 1 |
| Si72  | Si | 0.932  | 0.932  | 0.6288 | 1 |
| O73   | O  | 0.9515 | 0.4515 | 0.2048 | 1 |
| Si74  | Si | 0.932  | 0.432  | 0.1288 | 1 |
| O75   | O  | 0.4515 | 0.9515 | 0.2048 | 1 |
| Si76  | Si | 0.432  | 0.932  | 0.1288 | 1 |
| O77   | O  | 0.4515 | 0.4515 | 0.7048 | 1 |
| Si78  | Si | 0.432  | 0.432  | 0.6288 | 1 |
| O79   | O  | 0.2985 | 0.4515 | 0.0452 | 1 |
| Si80  | Si | 0.318  | 0.432  | 0.1212 | 1 |
| O81   | O  | 0.2985 | 0.9515 | 0.5452 | 1 |
| Si82  | Si | 0.318  | 0.932  | 0.6212 | 1 |
| O83   | O  | 0.7985 | 0.9515 | 0.0452 | 1 |
| Si84  | Si | 0.818  | 0.932  | 0.1212 | 1 |
| O85   | O  | 0.4515 | 0.7985 | 0.5452 | 1 |
| Si86  | Si | 0.432  | 0.818  | 0.6212 | 1 |
| O87   | O  | 0.9515 | 0.7985 | 0.0452 | 1 |
| Si88  | Si | 0.932  | 0.818  | 0.1212 | 1 |
| O89   | O  | 0.7985 | 0.5452 | 0.4515 | 1 |
| Si90  | Si | 0.818  | 0.6212 | 0.432  | 1 |
| O91   | O  | 0.7985 | 0.0452 | 0.9515 | 1 |
| Si92  | Si | 0.818  | 0.1212 | 0.932  | 1 |
| O93   | O  | 0.4515 | 0.0452 | 0.2985 | 1 |
| Si94  | Si | 0.432  | 0.1212 | 0.318  | 1 |
| O95   | O  | 0.9515 | 0.0452 | 0.7985 | 1 |
| Si96  | Si | 0.932  | 0.1212 | 0.818  | 1 |
| O97   | O  | 0.9515 | 0.7048 | 0.9515 | 1 |
| Si98  | Si | 0.932  | 0.6288 | 0.932  | 1 |
| O99   | O  | 0.9515 | 0.2048 | 0.4515 | 1 |
| Si100 | Si | 0.932  | 0.1288 | 0.432  | 1 |
| O101  | O  | 0.4515 | 0.7048 | 0.4515 | 1 |
| Si102 | Si | 0.432  | 0.6288 | 0.432  | 1 |
| O103  | O  | 0.4515 | 0.2048 | 0.9515 | 1 |
| Si104 | Si | 0.432  | 0.1288 | 0.932  | 1 |
| O105  | O  | 0.2985 | 0.2048 | 0.7985 | 1 |
| Si106 | Si | 0.318  | 0.1288 | 0.818  | 1 |
| O107  | O  | 0.2985 | 0.7048 | 0.2985 | 1 |
| Si108 | Si | 0.318  | 0.6288 | 0.318  | 1 |
| O109  | O  | 0.7985 | 0.7048 | 0.7985 | 1 |
| Si110 | Si | 0.818  | 0.6288 | 0.818  | 1 |
| O111  | O  | 0.0452 | 0.2985 | 0.4515 | 1 |

|       |    |        |        |        |   |
|-------|----|--------|--------|--------|---|
| Si112 | Si | 0.1212 | 0.318  | 0.432  | 1 |
| O113  | O  | 0.0452 | 0.7985 | 0.9515 | 1 |
| Si114 | Si | 0.1212 | 0.818  | 0.932  | 1 |
| O115  | O  | 0.5452 | 0.4515 | 0.7985 | 1 |
| Si116 | Si | 0.6212 | 0.432  | 0.818  | 1 |
| O117  | O  | 0.5452 | 0.9515 | 0.2985 | 1 |
| Si118 | Si | 0.6212 | 0.932  | 0.318  | 1 |
| O119  | O  | 0.0452 | 0.9515 | 0.7985 | 1 |
| Si120 | Si | 0.1212 | 0.932  | 0.818  | 1 |
| O121  | O  | 0.2048 | 0.7985 | 0.2985 | 1 |
| Si122 | Si | 0.1288 | 0.818  | 0.318  | 1 |
| O123  | O  | 0.7048 | 0.7985 | 0.7985 | 1 |
| Si124 | Si | 0.6288 | 0.818  | 0.818  | 1 |
| O125  | O  | 0.7048 | 0.9515 | 0.9515 | 1 |
| Si126 | Si | 0.6288 | 0.932  | 0.932  | 1 |
| O127  | O  | 0.7048 | 0.4515 | 0.4515 | 1 |
| Si128 | Si | 0.6288 | 0.432  | 0.432  | 1 |
| O129  | O  | 0.2048 | 0.9515 | 0.4515 | 1 |
| Si130 | Si | 0.1288 | 0.932  | 0.432  | 1 |
| O131  | O  | 0.2048 | 0.4515 | 0.9515 | 1 |
| Si132 | Si | 0.1288 | 0.432  | 0.932  | 1 |
| O133  | O  | 0.2985 | 0.7985 | 0.2048 | 1 |
| Si134 | Si | 0.318  | 0.818  | 0.1288 | 1 |
| O135  | O  | 0.2985 | 0.2985 | 0.7048 | 1 |
| Si136 | Si | 0.318  | 0.318  | 0.6288 | 1 |
| O137  | O  | 0.7985 | 0.4515 | 0.5452 | 1 |
| Si138 | Si | 0.818  | 0.432  | 0.6212 | 1 |
| O139  | O  | 0.4515 | 0.2985 | 0.0452 | 1 |
| Si140 | Si | 0.432  | 0.318  | 0.1212 | 1 |
| O141  | O  | 0.9515 | 0.2985 | 0.5452 | 1 |
| Si142 | Si | 0.932  | 0.318  | 0.6212 | 1 |
| O143  | O  | 0.2048 | 0.2985 | 0.7985 | 1 |
| Si144 | Si | 0.1288 | 0.318  | 0.818  | 1 |
| O145  | O  | 0.7048 | 0.2985 | 0.2985 | 1 |
| Si146 | Si | 0.6288 | 0.318  | 0.318  | 1 |
| O147  | O  | 0.5452 | 0.7985 | 0.4515 | 1 |
| Si148 | Si | 0.6212 | 0.818  | 0.432  | 1 |
| O149  | O  | 0.5452 | 0.2985 | 0.9515 | 1 |
| Si150 | Si | 0.6212 | 0.318  | 0.932  | 1 |
| O151  | O  | 0.0452 | 0.4515 | 0.2985 | 1 |
| Si152 | Si | 0.1212 | 0.432  | 0.318  | 1 |
| O153  | O  | 0.7985 | 0.2048 | 0.2985 | 1 |
| Si154 | Si | 0.818  | 0.1288 | 0.318  | 1 |
| O155  | O  | 0.4515 | 0.5452 | 0.7985 | 1 |
| Si156 | Si | 0.432  | 0.6212 | 0.818  | 1 |
| O157  | O  | 0.9515 | 0.5452 | 0.2985 | 1 |

|       |    |        |        |        |   |
|-------|----|--------|--------|--------|---|
| Si158 | Si | 0.932  | 0.6212 | 0.318  | 1 |
| O159  | O  | 0.2985 | 0.0452 | 0.4515 | 1 |
| Si160 | Si | 0.318  | 0.1212 | 0.432  | 1 |
| O161  | O  | 0.2985 | 0.5452 | 0.9515 | 1 |
| Si162 | Si | 0.318  | 0.6212 | 0.932  | 1 |
| O163  | O  | 0.2015 | 0.7015 | 0.7952 | 1 |
| Si164 | Si | 0.182  | 0.682  | 0.8712 | 1 |
| O165  | O  | 0.2015 | 0.2015 | 0.2952 | 1 |
| Si166 | Si | 0.182  | 0.182  | 0.3712 | 1 |
| O167  | O  | 0.7015 | 0.5485 | 0.9548 | 1 |
| Si168 | Si | 0.682  | 0.568  | 0.8788 | 1 |
| O169  | O  | 0.5485 | 0.2015 | 0.4548 | 1 |
| Si170 | Si | 0.568  | 0.182  | 0.3788 | 1 |
| O171  | O  | 0.0485 | 0.2015 | 0.9548 | 1 |
| Si172 | Si | 0.068  | 0.182  | 0.8788 | 1 |
| O173  | O  | 0.2015 | 0.4548 | 0.5485 | 1 |
| Si174 | Si | 0.182  | 0.3788 | 0.568  | 1 |
| O175  | O  | 0.2015 | 0.9548 | 0.0485 | 1 |
| Si176 | Si | 0.182  | 0.8788 | 0.068  | 1 |
| O177  | O  | 0.5485 | 0.9548 | 0.7015 | 1 |
| Si178 | Si | 0.568  | 0.8788 | 0.682  | 1 |
| O179  | O  | 0.0485 | 0.9548 | 0.2015 | 1 |
| Si180 | Si | 0.068  | 0.8788 | 0.182  | 1 |
| O181  | O  | 0.7015 | 0.7952 | 0.2015 | 1 |
| Si182 | Si | 0.682  | 0.8712 | 0.182  | 1 |
| O183  | O  | 0.9548 | 0.7015 | 0.5485 | 1 |
| Si184 | Si | 0.8788 | 0.682  | 0.568  | 1 |
| O185  | O  | 0.9548 | 0.2015 | 0.0485 | 1 |
| Si186 | Si | 0.8788 | 0.182  | 0.068  | 1 |
| O187  | O  | 0.4548 | 0.5485 | 0.2015 | 1 |
| Si188 | Si | 0.3788 | 0.568  | 0.182  | 1 |
| O189  | O  | 0.7952 | 0.2015 | 0.7015 | 1 |
| Si190 | Si | 0.8712 | 0.182  | 0.682  | 1 |
| O191  | O  | 0.2952 | 0.2015 | 0.2015 | 1 |
| Si192 | Si | 0.3712 | 0.182  | 0.182  | 1 |
| O193  | O  | 0.0931 | 0      | 0.4069 | 1 |
| O194  | O  | 0.0931 | 0.5    | 0.9069 | 1 |
| O195  | O  | 0.6569 | 0.25   | 0.9069 | 1 |
| O196  | O  | 0.6569 | 0.75   | 0.4069 | 1 |
| O197  | O  | 0.1569 | 0.75   | 0.9069 | 1 |
| O198  | O  | 0.1569 | 0.5    | 0.3431 | 1 |
| O199  | O  | 0.1569 | 0      | 0.8431 | 1 |
| O200  | O  | 0.6569 | 0.5    | 0.8431 | 1 |
| O201  | O  | 0.5931 | 0.75   | 0.8431 | 1 |
| O202  | O  | 0.5931 | 0.25   | 0.3431 | 1 |
| O203  | O  | 0.4069 | 0.0931 | 0      | 1 |



|      |   |        |        |        |   |
|------|---|--------|--------|--------|---|
| O204 | O | 0.4069 | 0.5931 | 0.5    | 1 |
| O205 | O | 0.9069 | 0.6569 | 0.25   | 1 |
| O206 | O | 0.9069 | 0.1569 | 0.75   | 1 |
| O207 | O | 0.3431 | 0.1569 | 0.5    | 1 |
| O208 | O | 0.3431 | 0.6569 | 0      | 1 |
| O209 | O | 0.8431 | 0.6569 | 0.5    | 1 |
| O210 | O | 0.8431 | 0.5931 | 0.75   | 1 |
| O211 | O | 0.8431 | 0.0931 | 0.25   | 1 |
| O212 | O | 0.3431 | 0.5931 | 0.25   | 1 |
| O213 | O | 0      | 0.4069 | 0.0931 | 1 |
| O214 | O | 0.5    | 0.4069 | 0.5931 | 1 |
| O215 | O | 0.25   | 0.9069 | 0.6569 | 1 |
| O216 | O | 0.75   | 0.9069 | 0.1569 | 1 |
| O217 | O | 0.5    | 0.3431 | 0.1569 | 1 |
| O218 | O | 0.5    | 0.8431 | 0.6569 | 1 |
| O219 | O | 0      | 0.3431 | 0.6569 | 1 |
| O220 | O | 0.75   | 0.8431 | 0.5931 | 1 |
| O221 | O | 0.25   | 0.8431 | 0.0931 | 1 |
| O222 | O | 0.25   | 0.3431 | 0.5931 | 1 |
| O223 | O | 0.75   | 0.3431 | 0.0931 | 1 |
| O224 | O | 0      | 0.9069 | 0.5931 | 1 |
| O225 | O | 0.5    | 0.9069 | 0.0931 | 1 |
| O226 | O | 0.25   | 0.4069 | 0.1569 | 1 |
| O227 | O | 0.75   | 0.4069 | 0.6569 | 1 |
| O228 | O | 0      | 0.8431 | 0.1569 | 1 |
| O229 | O | 0.8431 | 0.1569 | 0      | 1 |
| O230 | O | 0.4069 | 0.1569 | 0.25   | 1 |
| O231 | O | 0.4069 | 0.6569 | 0.75   | 1 |
| O232 | O | 0.9069 | 0.5931 | 0      | 1 |
| O233 | O | 0.9069 | 0.0931 | 0.5    | 1 |
| O234 | O | 0.3431 | 0.0931 | 0.75   | 1 |
| O235 | O | 0.1569 | 0.25   | 0.4069 | 1 |
| O236 | O | 0.6569 | 0      | 0.3431 | 1 |
| O237 | O | 0.0931 | 0.75   | 0.3431 | 1 |
| O238 | O | 0.0931 | 0.25   | 0.8431 | 1 |
| O239 | O | 0.5931 | 0      | 0.9069 | 1 |
| O240 | O | 0.5931 | 0.5    | 0.4069 | 1 |
| O241 | O | 0.9069 | 0      | 0.5931 | 1 |
| O242 | O | 0.9069 | 0.5    | 0.0931 | 1 |
| O243 | O | 0.4069 | 0      | 0.0931 | 1 |
| O244 | O | 0.3431 | 0.75   | 0.0931 | 1 |
| O245 | O | 0.3431 | 0.25   | 0.5931 | 1 |
| O246 | O | 0.8431 | 0.5    | 0.6569 | 1 |
| O247 | O | 0.8431 | 0      | 0.1569 | 1 |
| O248 | O | 0.4069 | 0.25   | 0.1569 | 1 |
| O249 | O | 0.4069 | 0.75   | 0.6569 | 1 |

|      |   |        |        |        |   |
|------|---|--------|--------|--------|---|
| O250 | O | 0.9069 | 0.75   | 0.1569 | 1 |
| O251 | O | 0.5931 | 0.9069 | 0      | 1 |
| O252 | O | 0.5931 | 0.4069 | 0.5    | 1 |
| O253 | O | 0.0931 | 0.4069 | 0      | 1 |
| O254 | O | 0.0931 | 0.3431 | 0.75   | 1 |
| O255 | O | 0.0931 | 0.8431 | 0.25   | 1 |
| O256 | O | 0.5931 | 0.3431 | 0.25   | 1 |
| O257 | O | 0.6569 | 0.8431 | 0.5    | 1 |
| O258 | O | 0.6569 | 0.3431 | 0      | 1 |
| O259 | O | 0.1569 | 0.4069 | 0.25   | 1 |
| O260 | O | 0.1569 | 0.9069 | 0.75   | 1 |
| O261 | O | 0      | 0.5931 | 0.9069 | 1 |
| O262 | O | 0      | 0.0931 | 0.4069 | 1 |
| O263 | O | 0.5    | 0.5931 | 0.4069 | 1 |
| O264 | O | 0.75   | 0.0931 | 0.3431 | 1 |
| O265 | O | 0.25   | 0.0931 | 0.8431 | 1 |
| O266 | O | 0.25   | 0.5931 | 0.3431 | 1 |
| O267 | O | 0.5    | 0.6569 | 0.8431 | 1 |
| O268 | O | 0      | 0.6569 | 0.3431 | 1 |
| O269 | O | 0.25   | 0.1569 | 0.4069 | 1 |
| O270 | O | 0.75   | 0.1569 | 0.9069 | 1 |
| O271 | O | 0.25   | 0.6569 | 0.9069 | 1 |
| O272 | O | 0.75   | 0.6569 | 0.4069 | 1 |
| O273 | O | 0.5    | 0.0931 | 0.9069 | 1 |
| O274 | O | 0.75   | 0.5931 | 0.8431 | 1 |
| O275 | O | 0.5    | 0.1569 | 0.3431 | 1 |
| O276 | O | 0      | 0.1569 | 0.8431 | 1 |
| O277 | O | 0.1569 | 0.3431 | 0.5    | 1 |
| O278 | O | 0.1569 | 0.8431 | 0      | 1 |
| O279 | O | 0.5931 | 0.8431 | 0.75   | 1 |
| O280 | O | 0.0931 | 0.9069 | 0.5    | 1 |
| O281 | O | 0.6569 | 0.9069 | 0.25   | 1 |
| O282 | O | 0.6569 | 0.4069 | 0.75   | 1 |
| O283 | O | 0.8431 | 0.75   | 0.5931 | 1 |
| O284 | O | 0.8431 | 0.25   | 0.0931 | 1 |
| O285 | O | 0.3431 | 0.5    | 0.1569 | 1 |
| O286 | O | 0.3431 | 0      | 0.6569 | 1 |
| O287 | O | 0.9069 | 0.25   | 0.6569 | 1 |
| O288 | O | 0.4069 | 0.5    | 0.5931 | 1 |
| O289 | O | 0.125  | 0.125  | 0.3721 | 1 |
| O290 | O | 0.125  | 0.625  | 0.8721 | 1 |
| O291 | O | 0.625  | 0.125  | 0.8721 | 1 |
| O292 | O | 0.625  | 0.625  | 0.3721 | 1 |
| O293 | O | 0.125  | 0.625  | 0.3779 | 1 |
| O294 | O | 0.125  | 0.125  | 0.8779 | 1 |
| O295 | O | 0.625  | 0.625  | 0.8779 | 1 |

|       |    |        |        |        |   |
|-------|----|--------|--------|--------|---|
| O296  | O  | 0.3721 | 0.125  | 0.125  | 1 |
| O297  | O  | 0.3721 | 0.625  | 0.625  | 1 |
| O298  | O  | 0.8721 | 0.125  | 0.625  | 1 |
| O299  | O  | 0.8721 | 0.625  | 0.125  | 1 |
| O300  | O  | 0.3779 | 0.125  | 0.625  | 1 |
| O301  | O  | 0.8779 | 0.625  | 0.625  | 1 |
| O302  | O  | 0.8779 | 0.125  | 0.125  | 1 |
| O303  | O  | 0.125  | 0.3721 | 0.125  | 1 |
| O304  | O  | 0.125  | 0.8721 | 0.625  | 1 |
| O305  | O  | 0.625  | 0.8721 | 0.125  | 1 |
| O306  | O  | 0.625  | 0.3721 | 0.625  | 1 |
| O307  | O  | 0.625  | 0.3779 | 0.125  | 1 |
| O308  | O  | 0.625  | 0.8779 | 0.625  | 1 |
| O309  | O  | 0.875  | 0.375  | 0.1279 | 1 |
| O310  | O  | 0.875  | 0.875  | 0.6279 | 1 |
| O311  | O  | 0.375  | 0.375  | 0.1221 | 1 |
| O312  | O  | 0.875  | 0.875  | 0.1221 | 1 |
| O313  | O  | 0.375  | 0.875  | 0.6221 | 1 |
| O314  | O  | 0.875  | 0.6221 | 0.375  | 1 |
| O315  | O  | 0.875  | 0.1221 | 0.875  | 1 |
| O316  | O  | 0.375  | 0.1221 | 0.375  | 1 |
| O317  | O  | 0.875  | 0.6279 | 0.875  | 1 |
| O318  | O  | 0.375  | 0.1279 | 0.875  | 1 |
| O319  | O  | 0.375  | 0.6279 | 0.375  | 1 |
| O320  | O  | 0.1221 | 0.375  | 0.375  | 1 |
| O321  | O  | 0.1221 | 0.875  | 0.875  | 1 |
| O322  | O  | 0.6221 | 0.375  | 0.875  | 1 |
| O323  | O  | 0.1279 | 0.875  | 0.375  | 1 |
| O324  | O  | 0.6279 | 0.875  | 0.875  | 1 |
| O325  | O  | 0.6279 | 0.375  | 0.375  | 1 |
| O326  | O  | 0.375  | 0.875  | 0.1279 | 1 |
| O327  | O  | 0.375  | 0.375  | 0.6279 | 1 |
| O328  | O  | 0.875  | 0.375  | 0.6221 | 1 |
| O329  | O  | 0.1279 | 0.375  | 0.875  | 1 |
| O330  | O  | 0.6221 | 0.875  | 0.375  | 1 |
| O331  | O  | 0.875  | 0.1279 | 0.375  | 1 |
| O332  | O  | 0.375  | 0.6221 | 0.875  | 1 |
| O333  | O  | 0.625  | 0.125  | 0.3779 | 1 |
| O334  | O  | 0.125  | 0.3779 | 0.625  | 1 |
| O335  | O  | 0.125  | 0.8779 | 0.125  | 1 |
| O336  | O  | 0.3779 | 0.625  | 0.125  | 1 |
| O337  | O  | 0.1716 | 0.1716 | 0.1716 | 1 |
| Si338 | Si | 0.2181 | 0.2181 | 0.2181 | 1 |
| O339  | O  | 0.1716 | 0.6716 | 0.6716 | 1 |
| Si340 | Si | 0.2181 | 0.7181 | 0.7181 | 1 |
| O341  | O  | 0.6716 | 0.1716 | 0.6716 | 1 |

|       |    |        |        |        |   |
|-------|----|--------|--------|--------|---|
| Si342 | Si | 0.7181 | 0.2181 | 0.7181 | 1 |
| O343  | O  | 0.6716 | 0.6716 | 0.1716 | 1 |
| Si344 | Si | 0.7181 | 0.7181 | 0.2181 | 1 |
| O345  | O  | 0.5784 | 0.0784 | 0.6716 | 1 |
| Si346 | Si | 0.5319 | 0.0319 | 0.7181 | 1 |
| O347  | O  | 0.5784 | 0.5784 | 0.1716 | 1 |
| Si348 | Si | 0.5319 | 0.5319 | 0.2181 | 1 |
| O349  | O  | 0.0784 | 0.6716 | 0.5784 | 1 |
| Si350 | Si | 0.0319 | 0.7181 | 0.5319 | 1 |
| O351  | O  | 0.0784 | 0.1716 | 0.0784 | 1 |
| Si352 | Si | 0.0319 | 0.2181 | 0.0319 | 1 |
| O353  | O  | 0.5784 | 0.1716 | 0.5784 | 1 |
| Si354 | Si | 0.5319 | 0.2181 | 0.5319 | 1 |
| O355  | O  | 0.6716 | 0.5784 | 0.0784 | 1 |
| Si356 | Si | 0.7181 | 0.5319 | 0.0319 | 1 |
| O357  | O  | 0.1716 | 0.5784 | 0.5784 | 1 |
| Si358 | Si | 0.2181 | 0.5319 | 0.5319 | 1 |
| O359  | O  | 0.9216 | 0.4216 | 0.3284 | 1 |
| Si360 | Si | 0.9681 | 0.4681 | 0.2819 | 1 |
| O361  | O  | 0.9216 | 0.9216 | 0.8284 | 1 |
| Si362 | Si | 0.9681 | 0.9681 | 0.7819 | 1 |
| O363  | O  | 0.8284 | 0.8284 | 0.8284 | 1 |
| Si364 | Si | 0.7819 | 0.7819 | 0.7819 | 1 |
| O365  | O  | 0.8284 | 0.3284 | 0.3284 | 1 |
| Si366 | Si | 0.7819 | 0.2819 | 0.2819 | 1 |
| O367  | O  | 0.3284 | 0.8284 | 0.3284 | 1 |
| Si368 | Si | 0.2819 | 0.7819 | 0.2819 | 1 |
| O369  | O  | 0.3284 | 0.3284 | 0.8284 | 1 |
| Si370 | Si | 0.2819 | 0.2819 | 0.7819 | 1 |
| O371  | O  | 0.4216 | 0.3284 | 0.9216 | 1 |
| Si372 | Si | 0.4681 | 0.2819 | 0.9681 | 1 |
| O373  | O  | 0.4216 | 0.8284 | 0.4216 | 1 |
| Si374 | Si | 0.4681 | 0.7819 | 0.4681 | 1 |
| O375  | O  | 0.9216 | 0.8284 | 0.9216 | 1 |
| Si376 | Si | 0.9681 | 0.7819 | 0.9681 | 1 |
| O377  | O  | 0.3284 | 0.9216 | 0.4216 | 1 |
| Si378 | Si | 0.2819 | 0.9681 | 0.4681 | 1 |
| O379  | O  | 0.8284 | 0.9216 | 0.9216 | 1 |
| Si380 | Si | 0.7819 | 0.9681 | 0.9681 | 1 |
| O381  | O  | 0.4216 | 0.9216 | 0.3284 | 1 |
| Si382 | Si | 0.4681 | 0.9681 | 0.2819 | 1 |
| O383  | O  | 0.4216 | 0.4216 | 0.8284 | 1 |
| Si384 | Si | 0.4681 | 0.4681 | 0.7819 | 1 |
| O385  | O  | 0.9216 | 0.3284 | 0.4216 | 1 |
| Si386 | Si | 0.9681 | 0.2819 | 0.4681 | 1 |
| O387  | O  | 0.3284 | 0.4216 | 0.9216 | 1 |

|       |    |         |         |         |   |
|-------|----|---------|---------|---------|---|
| Si388 | Si | 0.2819  | 0.4681  | 0.9681  | 1 |
| O389  | O  | 0.8284  | 0.4216  | 0.4216  | 1 |
| Si390 | Si | 0.7819  | 0.4681  | 0.4681  | 1 |
| O391  | O  | 0.0784  | 0.5784  | 0.6716  | 1 |
| Si392 | Si | 0.0319  | 0.5319  | 0.7181  | 1 |
| O393  | O  | 0.0784  | 0.0784  | 0.1716  | 1 |
| Si394 | Si | 0.0319  | 0.0319  | 0.2181  | 1 |
| O395  | O  | 0.5784  | 0.6716  | 0.0784  | 1 |
| Si396 | Si | 0.5319  | 0.7181  | 0.0319  | 1 |
| O397  | O  | 0.6716  | 0.0784  | 0.5784  | 1 |
| Si398 | Si | 0.7181  | 0.0319  | 0.5319  | 1 |
| O399  | O  | 0.1716  | 0.0784  | 0.0784  | 1 |
| Si400 | Si | 0.2181  | 0.0319  | 0.0319  | 1 |
| Si401 | Si | 0.125   | 0.125   | 0.125   | 1 |
| Si402 | Si | 0.125   | 0.625   | 0.625   | 1 |
| Si403 | Si | 0.625   | 0.125   | 0.625   | 1 |
| Si404 | Si | 0.625   | 0.625   | 0.125   | 1 |
| Si405 | Si | 0.875   | 0.375   | 0.375   | 1 |
| Si406 | Si | 0.875   | 0.875   | 0.875   | 1 |
| Si407 | Si | 0.375   | 0.375   | 0.875   | 1 |
| Si408 | Si | 0.375   | 0.875   | 0.375   | 1 |
| C409  | C  | 0.71195 | 0.12587 | 0.12721 | 1 |
| N410  | N  | 0.66852 | 0.16799 | 0.08373 | 1 |
| C411  | C  | 0.6264  | 0.12489 | 0.0394  | 1 |
| N412  | N  | 0.58238 | 0.08177 | 0.08182 | 1 |
| C413  | C  | 0.62333 | 0.03734 | 0.12538 | 1 |
| N414  | N  | 0.66639 | 0.08195 | 0.1704  | 1 |
| C415  | C  | 0.62118 | 0.1263  | 0.21353 | 1 |
| C416  | C  | 0.62423 | 0.21154 | 0.12545 | 1 |
| N417  | N  | 0.58023 | 0.16815 | 0.16755 | 1 |
| C418  | C  | 0.53781 | 0.12501 | 0.12357 | 1 |
| H419  | H  | 0.74413 | 0.15759 | 0.16166 | 1 |
| H420  | H  | 0.74556 | 0.09191 | 0.09647 | 1 |
| H421  | H  | 0.65922 | 0.09283 | 0.00565 | 1 |
| H422  | H  | 0.59459 | 0.15739 | 0.00504 | 1 |
| H423  | H  | 0.65789 | 0.00421 | 0.0948  | 1 |
| H424  | H  | 0.59074 | 0.00464 | 0.1585  | 1 |
| H425  | H  | 0.65417 | 0.15819 | 0.24704 | 1 |
| H426  | H  | 0.58871 | 0.09271 | 0.24586 | 1 |
| H427  | H  | 0.59244 | 0.245   | 0.092   | 1 |
| H428  | H  | 0.65536 | 0.24617 | 0.15823 | 1 |
| H429  | H  | 0.50264 | 0.09306 | 0.15495 | 1 |
| H430  | H  | 0.50495 | 0.15746 | 0.09018 | 1 |
| H431  | H  | 0.69546 | 0.05214 | 0.20122 | 1 |
| C432  | C  | 0.31249 | 0.40245 | 0.43076 | 1 |
| N433  | N  | 0.3583  | 0.44467 | 0.39004 | 1 |

|      |   |         |         |         |   |
|------|---|---------|---------|---------|---|
| C434 | C | 0.42972 | 0.42978 | 0.40652 | 1 |
| N435 | N | 0.44393 | 0.358   | 0.39092 | 1 |
| C436 | C | 0.40062 | 0.31316 | 0.43162 | 1 |
| N437 | N | 0.32762 | 0.32907 | 0.41432 | 1 |
| C438 | C | 0.31552 | 0.31639 | 0.33966 | 1 |
| C439 | C | 0.34681 | 0.43292 | 0.31703 | 1 |
| N440 | N | 0.36124 | 0.36114 | 0.30163 | 1 |
| C441 | C | 0.43268 | 0.34599 | 0.3179  | 1 |
| H442 | H | 0.258   | 0.41281 | 0.41852 | 1 |
| H443 | H | 0.3207  | 0.41043 | 0.48639 | 1 |
| H444 | H | 0.44071 | 0.44124 | 0.4612  | 1 |
| H445 | H | 0.46399 | 0.46337 | 0.37594 | 1 |
| H446 | H | 0.40816 | 0.32176 | 0.48725 | 1 |
| H447 | H | 0.41038 | 0.25842 | 0.41999 | 1 |
| H448 | H | 0.26099 | 0.32743 | 0.32821 | 1 |
| H449 | H | 0.32597 | 0.26162 | 0.32886 | 1 |
| H450 | H | 0.3811  | 0.46647 | 0.28645 | 1 |
| H451 | H | 0.29353 | 0.44663 | 0.30227 | 1 |
| H452 | H | 0.44585 | 0.29241 | 0.30374 | 1 |
| H453 | H | 0.46693 | 0.37955 | 0.28731 | 1 |
| H454 | H | 0.29637 | 0.29845 | 0.442   | 1 |
| C455 | C | 0.06597 | 0.09442 | 0.68672 | 1 |
| N456 | N | 0.1089  | 0.05428 | 0.64098 | 1 |
| C457 | C | 0.09374 | 0.07031 | 0.5695  | 1 |
| N458 | N | 0.10802 | 0.14272 | 0.5573  | 1 |
| C459 | C | 0.0649  | 0.18545 | 0.60047 | 1 |
| N460 | N | 0.0809  | 0.16846 | 0.67352 | 1 |
| C461 | C | 0.15488 | 0.18269 | 0.68786 | 1 |
| C462 | C | 0.18127 | 0.06753 | 0.65472 | 1 |
| N463 | N | 0.19534 | 0.13998 | 0.64218 | 1 |
| C464 | C | 0.18035 | 0.15618 | 0.57072 | 1 |
| H465 | H | 0.07725 | 0.08324 | 0.74126 | 1 |
| H466 | H | 0.01077 | 0.08526 | 0.67701 | 1 |
| H467 | H | 0.0396  | 0.05789 | 0.55694 | 1 |
| H468 | H | 0.1259  | 0.0382  | 0.53524 | 1 |
| H469 | H | 0.00974 | 0.17544 | 0.59133 | 1 |
| H470 | H | 0.07521 | 0.24068 | 0.59216 | 1 |
| H471 | H | 0.16526 | 0.17077 | 0.74242 | 1 |
| H472 | H | 0.16456 | 0.23793 | 0.67887 | 1 |
| H473 | H | 0.21359 | 0.03538 | 0.62067 | 1 |
| H474 | H | 0.19487 | 0.05305 | 0.70812 | 1 |
| H475 | H | 0.19338 | 0.21037 | 0.55908 | 1 |
| H476 | H | 0.21264 | 0.1242  | 0.53647 | 1 |
| H477 | H | 0.05157 | 0.19762 | 0.70472 | 1 |
| C478 | C | 0.56354 | 0.59919 | 0.68515 | 1 |
| N479 | N | 0.5803  | 0.67024 | 0.67008 | 1 |

|      |   |         |         |         |   |
|------|---|---------|---------|---------|---|
| C480 | C | 0.65256 | 0.68362 | 0.68423 | 1 |
| N481 | N | 0.6945  | 0.64003 | 0.64026 | 1 |
| C482 | C | 0.68117 | 0.56806 | 0.65434 | 1 |
| N483 | N | 0.60694 | 0.55496 | 0.6401  | 1 |
| C484 | C | 0.59201 | 0.5703  | 0.56644 | 1 |
| C485 | C | 0.56536 | 0.68573 | 0.59838 | 1 |
| N486 | N | 0.60779 | 0.64218 | 0.55487 | 1 |
| C487 | C | 0.68013 | 0.65533 | 0.56846 | 1 |
| H488 | H | 0.50899 | 0.58766 | 0.67427 | 1 |
| H489 | H | 0.57473 | 0.58596 | 0.73925 | 1 |
| H490 | H | 0.66442 | 0.67393 | 0.73908 | 1 |
| H491 | H | 0.66463 | 0.73846 | 0.67458 | 1 |
| H492 | H | 0.69198 | 0.55459 | 0.70847 | 1 |
| H493 | H | 0.71182 | 0.53432 | 0.62057 | 1 |
| H494 | H | 0.53742 | 0.5585  | 0.55605 | 1 |
| H495 | H | 0.62449 | 0.53656 | 0.53445 | 1 |
| H496 | H | 0.57602 | 0.74061 | 0.58739 | 1 |
| H497 | H | 0.51017 | 0.67745 | 0.58707 | 1 |
| H498 | H | 0.71269 | 0.62336 | 0.53453 | 1 |
| H499 | H | 0.693   | 0.70957 | 0.55668 | 1 |
| H500 | H | 0.59622 | 0.50523 | 0.64968 | 1 |
| C501 | C | 0.84384 | 0.31932 | 0.93352 | 1 |
| N502 | N | 0.85865 | 0.30587 | 0.86171 | 1 |
| C503 | C | 0.81504 | 0.34776 | 0.81769 | 1 |
| N504 | N | 0.82918 | 0.42002 | 0.83114 | 1 |
| C505 | C | 0.81348 | 0.43682 | 0.90205 | 1 |
| N506 | N | 0.85816 | 0.3935  | 0.94668 | 1 |
| C507 | C | 0.93196 | 0.40838 | 0.93199 | 1 |
| C508 | C | 0.93058 | 0.32017 | 0.84708 | 1 |
| N509 | N | 0.94419 | 0.39252 | 0.86019 | 1 |
| C510 | C | 0.90102 | 0.4349  | 0.81622 | 1 |
| H511 | H | 0.87721 | 0.28865 | 0.96761 | 1 |
| H512 | H | 0.78954 | 0.30865 | 0.94646 | 1 |
| H513 | H | 0.76011 | 0.33594 | 0.82696 | 1 |
| H514 | H | 0.8251  | 0.33562 | 0.76294 | 1 |
| H515 | H | 0.75928 | 0.42559 | 0.91482 | 1 |
| H516 | H | 0.82427 | 0.49138 | 0.91361 | 1 |
| H517 | H | 0.9636  | 0.3759  | 0.96605 | 1 |
| H518 | H | 0.94228 | 0.46297 | 0.94386 | 1 |
| H519 | H | 0.94277 | 0.3072  | 0.79296 | 1 |
| H520 | H | 0.96418 | 0.2876  | 0.87939 | 1 |
| H521 | H | 0.91228 | 0.4901  | 0.82447 | 1 |
| H522 | H | 0.9124  | 0.42416 | 0.76143 | 1 |
| H523 | H | 0.84812 | 0.40431 | 0.99633 | 1 |
| C524 | C | 0.09772 | 0.68119 | 0.18268 | 1 |
| N525 | N | 0.11009 | 0.60872 | 0.19476 | 1 |

|      |   |         |         |         |   |
|------|---|---------|---------|---------|---|
| C526 | C | 0.06532 | 0.56675 | 0.15206 | 1 |
| N527 | N | 0.07978 | 0.58109 | 0.08003 | 1 |
| C528 | C | 0.06643 | 0.65277 | 0.06453 | 1 |
| N529 | N | 0.11236 | 0.69525 | 0.10873 | 1 |
| C530 | C | 0.18568 | 0.67853 | 0.09371 | 1 |
| C531 | C | 0.18159 | 0.59199 | 0.18031 | 1 |
| N532 | N | 0.19557 | 0.60615 | 0.1082  | 1 |
| C533 | C | 0.15118 | 0.56423 | 0.06504 | 1 |
| H534 | H | 0.13223 | 0.71358 | 0.21396 | 1 |
| H535 | H | 0.04388 | 0.69572 | 0.19365 | 1 |
| H536 | H | 0.01067 | 0.57728 | 0.1641  | 1 |
| H537 | H | 0.07393 | 0.51154 | 0.16323 | 1 |
| H538 | H | 0.01262 | 0.667   | 0.07586 | 1 |
| H539 | H | 0.07765 | 0.66496 | 0.01019 | 1 |
| H540 | H | 0.21833 | 0.71091 | 0.12692 | 1 |
| H541 | H | 0.19648 | 0.69111 | 0.03937 | 1 |
| H542 | H | 0.19213 | 0.53729 | 0.1923  | 1 |
| H543 | H | 0.21615 | 0.62259 | 0.21349 | 1 |
| H544 | H | 0.16284 | 0.57305 | 0.01001 | 1 |
| H545 | H | 0.16096 | 0.50898 | 0.07496 | 1 |
| H546 | H | 0.10398 | 0.74537 | 0.09884 | 1 |
| C547 | C | 0.93693 | 0.81184 | 0.39953 | 1 |
| N548 | N | 0.92023 | 0.83005 | 0.32918 | 1 |
| C549 | C | 0.84816 | 0.81559 | 0.31503 | 1 |
| N550 | N | 0.80573 | 0.8573  | 0.36034 | 1 |
| C551 | C | 0.81896 | 0.83998 | 0.43161 | 1 |
| N552 | N | 0.89298 | 0.85442 | 0.44558 | 1 |
| C553 | C | 0.90729 | 0.9288  | 0.43359 | 1 |
| C554 | C | 0.93441 | 0.9025  | 0.3169  | 1 |
| N555 | N | 0.89151 | 0.94367 | 0.36228 | 1 |
| C556 | C | 0.81936 | 0.92983 | 0.34834 | 1 |
| H557 | H | 0.99132 | 0.82275 | 0.41175 | 1 |
| H558 | H | 0.92618 | 0.75712 | 0.41026 | 1 |
| H559 | H | 0.8369  | 0.76028 | 0.32254 | 1 |
| H560 | H | 0.83604 | 0.82727 | 0.26061 | 1 |
| H561 | H | 0.8087  | 0.78518 | 0.4425  | 1 |
| H562 | H | 0.78785 | 0.87179 | 0.46677 | 1 |
| H563 | H | 0.96179 | 0.93909 | 0.44591 | 1 |
| H564 | H | 0.87452 | 0.95893 | 0.46874 | 1 |
| H565 | H | 0.92368 | 0.91568 | 0.26252 | 1 |
| H566 | H | 0.9895  | 0.91398 | 0.32567 | 1 |
| H567 | H | 0.78626 | 0.96193 | 0.38165 | 1 |
| H568 | H | 0.8065  | 0.94379 | 0.29461 | 1 |
| H569 | H | 0.90371 | 0.84259 | 0.49485 | 1 |
| C570 | C | 0.43112 | 0.81958 | 0.84142 | 1 |
| N571 | N | 0.35979 | 0.8054  | 0.85763 | 1 |



|      |   |         |         |         |   |
|------|---|---------|---------|---------|---|
| C572 | C | 0.34663 | 0.81839 | 0.9301  | 1 |
| N573 | N | 0.3596  | 0.89062 | 0.94461 | 1 |
| C574 | C | 0.43092 | 0.90729 | 0.93089 | 1 |
| N575 | N | 0.44411 | 0.89364 | 0.85657 | 1 |
| C576 | C | 0.39814 | 0.93729 | 0.81357 | 1 |
| C577 | C | 0.3145  | 0.84764 | 0.8157  | 1 |
| N578 | N | 0.32781 | 0.91973 | 0.83077 | 1 |
| C579 | C | 0.31439 | 0.93335 | 0.90311 | 1 |
| H580 | H | 0.44287 | 0.80985 | 0.7867  | 1 |
| H581 | H | 0.46619 | 0.7886  | 0.87348 | 1 |
| H582 | H | 0.37986 | 0.78545 | 0.96243 | 1 |
| H583 | H | 0.29286 | 0.80483 | 0.94326 | 1 |
| H584 | H | 0.46602 | 0.87472 | 0.9613  | 1 |
| H585 | H | 0.44251 | 0.96185 | 0.94172 | 1 |
| H586 | H | 0.40969 | 0.92691 | 0.75894 | 1 |
| H587 | H | 0.40962 | 0.99176 | 0.82484 | 1 |
| H588 | H | 0.26007 | 0.83494 | 0.82673 | 1 |
| H589 | H | 0.32269 | 0.83683 | 0.76039 | 1 |
| H590 | H | 0.32255 | 0.98844 | 0.91501 | 1 |
| H591 | H | 0.25994 | 0.92207 | 0.91548 | 1 |
| H592 | H | 0.4934  | 0.90498 | 0.84553 | 1 |
